# Supplementary material
Source: PubMed Central journal article supplement (PMC6238157)
Supplement: blood847798-suppl1.pdf [file blood847798-suppl1.pdf]

**Supplementary file – Futterer et al 2018**

**Supplementary Table 1**

Summary of Whole exome sequencing results for both patients.

| Variant type                  | Patient III:3 |       | Patient III:5 |       |
|-------------------------------|---------------|-------|---------------|-------|
|                               | known         | novel | known         | novel |
| All variants                  | 23943         | 583   | 24293         | 607   |
| heterozygous                  | 13111         | 506   | 13712         | 524   |
| homozygous                    | 10832         | 77    | 10581         | 83    |
| Coding variants               | 21143         | 522   | 21441         | 540   |
| heterozygous                  | 11614         | 457   | 12114         | 471   |
| homozygous                    | 9529          | 65    | 9327          | 69    |
| Splice variants               | 2800          | 61    | 2852          | 67    |
| heterozygous                  | 1497          | 49    | 1598          | 53    |
| homozygous                    | 1303          | 12    | 1254          | 14    |
| Nonsynonymous SNVs            | 9678          | 277   | 9785          | 275   |
| heterozygous                  | 5326          | 246   | 5530          | 255   |
| homozygous                    | 4352          | 31    | 4255          | 20    |
| Synonymous SNVs               | 10871         | 190   | 11070         | 194   |
| heterozygous                  | 6017          | 178   | 6299          | 176   |
| homozygous                    | 4854          | 12    | 4771          | 18    |
| Stoploss SNVs                 | 47            | 0     | 45            | 2     |
| heterozygous                  | 16            | 0     | 19            | 1     |
| homozygous                    | 31            | 0     | 26            | 1     |
| Stopgain SNVs                 | 82            | 3     | 82            | 5     |
| heterozygous                  | 59            | 3     | 65            | 5     |
| homozygous                    | 23            | 0     | 17            | 0     |
| Deletions                     | 204           | 21    | 203           | 34    |
| heterozygous                  | 99            | 11    | 106           | 21    |
| homozygous                    | 105           | 10    | 97            | 13    |
| Insertions                    | 220           | 30    | 221           | 27    |
| heterozygous                  | 73            | 18    | 76            | 12    |
| homozygous                    | 147           | 12    | 145           | 15    |
| Frameshift deletions          | 69            | 5     | 69            | 9     |
| heterozygous                  | 22            | 2     | 29            | 5     |
| homozygous                    | 47            | 3     | 40            | 4     |
| Frameshift insertions         | 112           | 9     | 119           | 8     |
| heterozygous                  | 21            | 5     | 22            | 0     |
| homozygous                    | 91            | 4     | 97            | 8     |
| Transition:Transversion ratio | 3.02          | 2.87  | 3             | 3.16  |
| heterozygous                  | 3.13          | 2.94  | 3.07          | 3.04  |
| homozygous                    | 2.88          | 2.28  | 2.91          | 5.14  |

## Supplementary Table 2

Pathogenicity prediction and variant classification of the genetic variants. PhyloP scores vary between -14 and +6 and measure conservation at each individual base, sites predicted to be conserved are assigned a positive score, fast evolving sites are assigned a negative score.

PhastCons values vary between 0 and 1 and reflect the probability that each nucleotide belongs to a conserved element. Mutationtaster uses a Bayes classifier to predict the effect of a mutation from a feed a classifiers. SIFT damaging prediction score= <0.05. Provean deleterious score = <-2.5. PolyPhen-2 predictions are appraised qualitatively as benign or damaging. The ACMG consensus guidelines, including supporting evidence, are also shown.

| Gene            | Variant                       | Protein effect           | EXaC     | PhyloP | Phast Cons | Mutation taster | SIFT      | Provean     | PolyPhen- | ACMG                       | Classification         |
|-----------------|-------------------------------|--------------------------|----------|--------|------------|-----------------|-----------|-------------|-----------|----------------------------|------------------------|
| <i>ANKRD18A</i> | c.2395_2397del <sup>hom</sup> | p.E799del <sup>hom</sup> | Novel    | 0.772  | 0.965      | Polymorphism    | NA        | Deleterious | NA        | PM2, PP (segregation), PM6 | Uncertain Significance |
| <i>GNE</i>      | c.G1246A <sup>hom</sup>       | p.G416R <sup>hom</sup>   | Novel    | 5.343  | 1          | Disease causing | Damaging  | Neutral     | Damaging  | PM2, PP (segregation), PM6 | Uncertain Significance |
| <i>FRMPD1</i>   | c.C1526T <sup>hom</sup>       | p.A509V <sup>hom</sup>   | 0.000371 | -1.459 | 0          | Polymorphism    | Tolerated | Neutral     | Benign    | PM2, PP (segregation), PM6 | Uncertain Significance |

## **Supplemental Acknowledgements**

The members of the UK Genotyping and Phenotyping of Platelets Study Group are: Steve P. Watson (University of Birmingham); Andrew D. Mumford and Stuart J. Mundell (University of Bristol); Paul Gissen (University College London); Martina E. Daly (University of Sheffield); Will Lester and Justin Clark (Birmingham Women's Hospital); Mike Williams, Jayashree Motwani, Dianne Marshall, Natalie Lawson, Priscilla Nyatanga, Pat Mann, and Julie Kirwan (Birmingham Children's Hospital); Jonathan Wilde, Tracey Dunkley, Pam Green and April Greenway (University Hospital Birmingham); Michael Makris (Sheffield Haemophilia and Thrombosis Centre, Royal Hallamshire Hospital); Jeanette Payne (Paediatric Haematology Centre, Sheffield Children's Hospital); Sue Pavord, Richard Gooding and Rashesh Dattani (University Hospitals Leicester); Gerry Dolan Charlotte Grimley, Simone Stokley, Emma Astwood, Karyn Longmuir, Cherry Chang, Merri Foros, Michelle Kightley and Linda Trower (Nottingham University Hospitals); Jecko Thachil (previously Paula Bolton Maggs), Charlie Hay, Gill Pike, Andrew Will, John Grainger, Matt Foulkes, and Mona Fareh (Central Manchester National Health Service [NHS] Foundation Trust); Kate Talks, Tina Biss, Patrick Kesteven, John Hanley, Julie Vowles, Lesley Basey, Kevin Knaggs and Michelle Barnes (Newcastle upon Tyne Hospitals NHS Trust); Peter Collins, Rachel Rayment, Raza Alikhan, Ana Guerrero Rebecca Morris, and Dianne Mansell (Cardiff and Vale University Local Health Board); Cheng Hock Toh and Vanessa Martlew (Royal Liverpool University Hospitals); Elaine Murphy and Robin Lachmann (University College London Hospitals NHS Trust); Peter Rose, Oliver Chapman, Anand Lokare, Kathryn Marshall, and Naseem Khan (University Hospitals Coventry and Warwickshire); David Keeling, Nikki Curry and Paul Giangrande (Oxford Radcliffe Hospitals NHS

Trust); Steve Austin, David Bevan and Jayanthi Alamelu (Guys' and St. Thomas' NHS Foundation Trust); David Allsup, Andrew Fletcher, Katherine Gladstone, Jeanette Fenwick, Philippa Woods and Darren Camp (Hull and East Yorkshire Hospitals NHS trust, Castle Hill Hospital, Hull); Beki James, Suzie Preston and Chung Lai-Wah (Leeds Teaching Hospitals NHS trust); Angela Thomas (Royal Hospital for Sick Children Edinburgh); Bethan Myers (Lincoln County Hospital); Gillian Evans, Kim Elliot, Karen Davies, Charlotte Graham and Miranda Foad, (Kent & Canterbury Hospital).

Dr Neil Morgan has authorized authorship on behalf of the UK Genotyping and Phenotyping of Platelets Study Group.
